# Supplementary material
Source: PubMed Central journal article supplement (PMC11256193)
Supplement: NIHMS2007062-supplement-Source_Data_Extended_Data_Fig__1.pdf [file NIHMS2007062-supplement-Source_Data_Extended_Data_Fig__1.pdf]

1a:

| control | iron deficient diet |
|---------|---------------------|
| 15.8    | 8.1                 |
| 17.3    | 9.4                 |
| 16      | 12.8                |
| 17      | 10.8                |
| 16.2    | 7.6                 |
| 16.4    | 6.6                 |
| 16.2    | 4.7                 |
| 16      | 7.9                 |

51b:

| control | iron deficient diet |
|---------|---------------------|
| 44.3    | 33.9                |
| 44.7    | 39.8                |
| 46.3    | 34.5                |
| 46.5    | 37.3                |
| 45.3    | 38.4                |
| 45.3    | 38                  |
| 44.7    | 41.8                |
| 45.1    | 36.4                |
