# Supplementary material
Source: PubMed Central journal article supplement (PMC11256193)
Supplement: NIHMS2007062-supplement-Source_Data_Extended_Data_Fig__2.pdf [file NIHMS2007062-supplement-Source_Data_Extended_Data_Fig__2.pdf]

2a:

| DFC (uM): | 25   | 100  | 400  |
|-----------|------|------|------|
| 19        | 14.1 | 13.4 | 13.8 |
| 17.2      | 12.9 | 12.5 | 13.2 |
| 17.3      | 13.4 | 11.9 | 13.2 |
| 12.5      | 11.3 | 12.2 | 15.1 |
| 13.9      | 12.5 | 13.7 | 14.7 |
| 12.7      | 12.6 | 12.5 | 15   |

2b:

| DFC (uM): | 400  |
|-----------|------|
| 2524      | 1311 |
| 2439      | 1337 |
| 2464      | 1356 |
| 2502      | 1229 |
| 2786      | 1319 |
| 2501      | 1331 |

2c:

| DFC (uM): | 400  |
|-----------|------|
| 56.7      | 104  |
| 35.2      | 102  |
| 29.9      | 73.9 |
| 18.5      | 87   |
| 43.5      | 71.8 |
| 36.1      | 90   |

2d:

| DFC (uM): | 400 |
|-----------|-----|
| 163       | 171 |
| 154       | 163 |
| 137       | 169 |
| 138       | 165 |
| 140       | 162 |
| 142       | 170 |

2q:

| DFC (uM): | 25    | 100   | 400   |
|-----------|-------|-------|-------|
| 22.2      | 15.73 | 11    | 11.9  |
| 20.5      | 15.7  | 12.18 | 11.5  |
| 20.35     | 15.26 | 10.4  | 11.1  |
| 17.8      | 22.8  | 22.1  | 26.97 |
| 16.7      | 21.2  | 21.6  | 27    |
| 16.68     | 21.3  | 21.7  | 25.26 |

2h:

| DFC (uM): | 25   | 100  | 400   |
|-----------|------|------|-------|
| 52.5      | 55.9 | 52.6 | 44    |
| 51        | 54.3 | 52.5 | 42.65 |
| 50.4      | 54   | 50.7 | 43.92 |
| 52.3      | 51   | 48   | 53.1  |
| 51.8      | 48.6 | 47   | 53    |
| 52        | 49   | 46.5 | 52.1  |

2i:

| DFC (uM): | 25   | 100  | 400  |
|-----------|------|------|------|
| 6.94      | 7.45 | 4.55 | 9.06 |
| 8.91      | 6.7  | 8.3  | 6.37 |
| 9.13      | 6.72 | 6.72 | 5.26 |
| 3.93      | 7.29 | 6.26 | 5.72 |
| 3.16      | 8.23 | 6.27 | 6.53 |
| 2.93      | 7.39 | 9.29 | 10.9 |

2k:

| DFC (uM): | 25   | 100   | 400  |
|-----------|------|-------|------|
| 0.7       | 0.54 | 0.33  | 0.3  |
| 0.8       | 0.47 | 0.35  | 0.24 |
| 0.64      | 0.5  | 0.264 | 0.26 |
| 1.9       | 1.2  | 1.06  | 1.53 |
| 1.6       | 1.15 | 0.8   | 1.56 |
| 1.5       | 1.18 | 0.97  | 1.45 |

2l:

| DFC (uM): | 25   | 100  | 400  |
|-----------|------|------|------|
| 1.39      | 0.89 | 0.42 | 0.39 |
| 1.46      | 0.9  | 0.44 | 0.34 |
| 1.37      | 0.86 | 0.4  | 0.39 |
| 3.7       | 3.2  | 2.86 | 2.25 |
| 3.5       | 3.3  | 2.92 | 2.13 |
| 3.77      | 3.1  | 2.57 | 2.01 |

2n:

| DFC (uM): | 25  | 100 | 400  |
|-----------|-----|-----|------|
| 292       | 432 | 417 | 529  |
| 417       | 600 | 959 | 1411 |
| 327       | 489 | 920 | 1311 |

2o:

| DFC (uM): | 25  | 100 | 400 |
|-----------|-----|-----|-----|
| 893       | 744 | 823 | 590 |
| 723       | 708 | 587 | 467 |
| 585       | 546 | 520 | 436 |

2r:

| DFC (uM): | 25    | 100   | 400   |
|-----------|-------|-------|-------|
| 35.57     | 32.49 | 20.09 | 13.87 |
| 35.9      | 36.17 | 32.8  | 24.5  |
| 35.8      | 35.9  | 25.8  | 23.6  |

2s:

| DFC (uM): | 25   | 100  | 400  |
|-----------|------|------|------|
| 6.97      | 7.38 | 4.13 | 1.81 |
| 5.38      | 5.8  | 4.66 | 4.88 |
| 7.7       | 4.7  | 3.43 | 2.95 |

2t:

| DFC (uM): | 6.25  | 25    | 100  |
|-----------|-------|-------|------|
| 9739      | 10206 | 11073 | 9285 |
| 9910      | 10373 | 11054 | 9340 |
| 10016     | 10392 | 11106 | 9226 |
| 10133     | 10576 | 10996 | 9161 |
| 10736     | 10974 | 10683 | 9116 |
| 10732     | 11050 | 10732 | 9071 |
| 10819     | 11121 | 10737 | 8986 |
| 10829     | 11039 | 10824 | 8983 |

2u:

| DFC (uM): | 6.25    | 25      | 100     |
|-----------|---------|---------|---------|
| 100       | 94.7696 | 85.5802 | 76.8612 |
| 100       | 88.4865 | 87.6146 | 69.4165 |
| 100       | 93.8296 | 91.4442 | 71.8961 |
| 100       | 104.343 | 78.9873 | 71.2253 |
| 100       | 96.3636 | 89.0909 | 70.9091 |
| 100       | 103.636 | 96.3636 | 69.0909 |
| 100       | 89.8305 | 93.2203 | 81.3559 |
| 98.30508  | 86.4407 | 105.085 | 79.661  |
