# Supplementary material
Source: PubMed Central journal article supplement (PMC11256193)
Supplement: NIHMS2007062-supplement-Source_Data_Extended_Data_Fig__3.pdf [file NIHMS2007062-supplement-Source_Data_Extended_Data_Fig__3.pdf]

3e

| DFO (µM): 0 | 100   |
|-------------|-------|
| 26975       | 20487 |
| 27467       | 20378 |
| 27312       | 20078 |
| 27365       | 15185 |
| 27515       | 15248 |
| 27140       | 14957 |

3e

| DFO (µM): 0 | 100  |
|-------------|------|
| 2430        | 4661 |
| 2577        | 5081 |
| 2783        | 5287 |
| 2158        | 4012 |
| 2217        | 4121 |
| 2321        | 4242 |

3e

| DFO (µM): 0 | 100  |
|-------------|------|
| 2430        | 4661 |
| 2577        | 5081 |
| 2783        | 5287 |
| 2158        | 4012 |
| 2217        | 4121 |
| 2321        | 4242 |

3h

| control | SI   | \ deficient | control | L1 | \ deficient | L1 |
|---------|------|-------------|---------|----|-------------|----|
| 5157    | 3311 | 8139        | 5244    |    |             |    |
| 4424    | 3765 | 7994        | 3436    |    |             |    |
| 4729    | 3471 | 10790       | 3744    |    |             |    |
| 4497    | 3234 | 6844        | 3782    |    |             |    |
| 5202    | 4190 | 8094        | 3619    |    |             |    |
| 4626    |      | 6840        |         |    |             |    |
| 4687    |      | 6236        |         |    |             |    |

3i

| control | SI    | \ deficient | control | L1 | \ deficient | L1 |
|---------|-------|-------------|---------|----|-------------|----|
| 9153    | 44831 | 28041       | 75588   |    |             |    |
| 6622    | 48975 | 21039       | 59775   |    |             |    |
| 8631    | 37722 | 21880       | 65752   |    |             |    |
| 779     | 63024 | 17843       | 46961   |    |             |    |
| 34541   | 45694 | 29888       | 52950   |    |             |    |
| 16331   |       | 21860       |         |    |             |    |
| 17569   |       | 22336       |         |    |             |    |

3j

| control | SI | iron deficient | SI | control | L1 | \ deficient | L1 |
|---------|----|----------------|----|---------|----|-------------|----|
| 165     |    | 70.5           |    | 95.9    |    | 93.8        |    |
| 127     |    | 75.4           |    | 69.7    |    | 99.8        |    |
| 188     |    | 78.2           |    | 111     |    | 106         |    |
| 147     |    | 83.7           |    | 77.6    |    | 115         |    |
| 131     |    | 82.3           |    | 104     |    | 104         |    |
| 145     |    |                |    | 137     |    |             |    |
| 136     |    |                |    | 164     |    |             |    |

3m

| DFO (µM): 0 | 100     |
|-------------|---------|
| 106.9061    | 78.7681 |
| 91.93023    | 65.1738 |
| 87.3104     | 61.5093 |

3n

| DFO (µM): 0 | 100     |
|-------------|---------|
| 146.592     | 92.5492 |
| 132.188     | 81.4156 |
| 121.657     | 86.3265 |

3o

| "-MIG" | "+MIG+DFO" | "+MIG-Ahr+DFO" |
|--------|------------|----------------|
| 39.3   | 29         | 41.45          |
| 39.2   | 27.6       | 41.2           |
| 39     | 25.75      | 43.4           |
| 46.7   | 27.4       | 40.6           |
| 46     | 26.8       | 39.6           |
| 45.7   | 26         | 39             |

3p

| "-MIT" | "+MIT+DFO" | "MIT-RORat+DFO" |
|--------|------------|-----------------|
| 30.68  | 19.6       | 31.43           |
| 29.5   | 18.6       | 30              |
| 29.2   | 17.4       | 30.4            |
