# Supplementary material
Source: PubMed Central journal article supplement (PMC11256193)
Supplement: NIHMS2007062-supplement-Source_Data_Extended_Data_Fig__4.pdf [file NIHMS2007062-supplement-Source_Data_Extended_Data_Fig__4.pdf]

4a:

| ctr     | cKO         |
|---------|-------------|
| 1.05243 | 0.134255827 |
| 0.83883 | 0.345825387 |
| 1.12275 | 0.113349676 |

4c:

| The # | SI   | #    | Rorc-cr | The # | LI | The # | Rorc-cr | LI |
|-------|------|------|---------|-------|----|-------|---------|----|
| 3812  | 2776 | 4616 | 4103    |       |    |       |         |    |
| 5109  | 3096 | 5167 | 4171    |       |    |       |         |    |
| 4449  | 2445 | 4559 | 4251    |       |    |       |         |    |

4b:

| The # | SI   | #    | Rorc-cr | The # | LI | # | Rorc-cr | LI |
|-------|------|------|---------|-------|----|---|---------|----|
| 2.45  | 1.87 | 1.65 | 4.83    |       |    |   |         |    |
| 1.77  | 3.85 | 1.86 | 9.87    |       |    |   |         |    |
| 3.99  | 1.23 | 3.31 | 5.71    |       |    |   |         |    |
| 11.4  | 3.82 | 7.29 | 9.36    |       |    |   |         |    |
| 7.69  | 9.6  | 6.7  | 8.7     |       |    |   |         |    |
| 6.95  | 10.5 | 11.2 | 7.14    |       |    |   |         |    |
|       | 10.6 |      | 6.87    |       |    |   |         |    |

4f:

| The # | SI   | The # | Rorc-cr | SI | The # | LI | # | Rorc-cr | LI |
|-------|------|-------|---------|----|-------|----|---|---------|----|
| 9     | 0.43 | 5.64  | 1.69    |    |       |    |   |         |    |
| 7.58  | 0.97 | 4.87  | 1.47    |    |       |    |   |         |    |
| 5.08  | 1.17 | 5.24  | 1.15    |    |       |    |   |         |    |
| 8.25  | 1.08 | 4.2   | 0.9     |    |       |    |   |         |    |
| 8.65  | 1.02 | 3.58  | 0.98    |    |       |    |   |         |    |
| 7.34  | 0.97 | 3.21  | 1.38    |    |       |    |   |         |    |
| 5.46  | 1.31 | 2.77  | 1.31    |    |       |    |   |         |    |
| 5.67  |      | 2.72  |         |    |       |    |   |         |    |
| 6.12  |      | 3.25  |         |    |       |    |   |         |    |

4h:

| The # | SI   | #    | Rorc-cr | The # | LI | # | Rorc-cr | LI |
|-------|------|------|---------|-------|----|---|---------|----|
| 7.93  | 1.78 | 10.2 | 3.56    |       |    |   |         |    |
| 6.06  | 3.64 | 11.5 | 5.23    |       |    |   |         |    |
| 6.85  | 4.17 | 13   | 4.28    |       |    |   |         |    |
| 8.24  | 4.76 | 10.7 | 4.29    |       |    |   |         |    |
| 10.7  | 3.28 | 9.8  | 3.22    |       |    |   |         |    |
| 8.8   | 5.05 | 13.8 | 4.49    |       |    |   |         |    |
| 5.55  | 1.68 | 8.98 | 3.6     |       |    |   |         |    |
| 6.01  |      | 10.2 |         |       |    |   |         |    |
| 6.23  |      | 7.6  |         |       |    |   |         |    |

4i:

| The # | SI   | #    | Rorc-cr | The # | LI | # | Rorc-cr | LI |
|-------|------|------|---------|-------|----|---|---------|----|
| 31.8  | 15.1 | 16.6 | 7.69    |       |    |   |         |    |
| 31.3  | 12.5 | 16.5 | 8.4     |       |    |   |         |    |
| 31.1  | 11.5 | 17.8 | 6.64    |       |    |   |         |    |
| 46.2  | 12.8 | 20.3 | 6.28    |       |    |   |         |    |
| 49.6  | 8.74 | 16.1 | 5.93    |       |    |   |         |    |
| 49.2  | 11.5 | 19.7 | 9.04    |       |    |   |         |    |
| 35    | 6.46 | 15.7 | 6.63    |       |    |   |         |    |
| 36.7  |      | 18.1 |         |       |    |   |         |    |
| 24.9  |      | 14.3 |         |       |    |   |         |    |

4k:

| The # | SI   | #    | Rorc-cr | The # | LI | # | Rorc-cr | LI |
|-------|------|------|---------|-------|----|---|---------|----|
| 28.9  | 46.8 | 65.8 | 61.1    |       |    |   |         |    |
| 31.1  | 36.9 | 63.4 | 64      |       |    |   |         |    |
| 29.6  | 38.6 | 59   | 64.7    |       |    |   |         |    |
| 40.8  | 52.6 | 57.3 | 64.4    |       |    |   |         |    |
| 39.7  | 47.1 | 62.2 | 59      |       |    |   |         |    |
| 40.9  | 53   | 58.2 | 57.4    |       |    |   |         |    |
| 35.7  | 46   | 58.3 | 55.2    |       |    |   |         |    |
| 31.6  |      | 44.2 |         |       |    |   |         |    |
| 30.3  |      | 55.7 |         |       |    |   |         |    |

4m:

| The # | SI   | The # | Rorc-cr | SI | The # | LI | # | Rorc-cr | LI |
|-------|------|-------|---------|----|-------|----|---|---------|----|
| 19.7  | 21.3 | 41.5  | 41.2    |    |       |    |   |         |    |
| 49    | 26.9 | 40    | 29      |    |       |    |   |         |    |
| 47.6  | 39   | 37.8  | 42      |    |       |    |   |         |    |
| 21    | 36.2 | 34.3  | 40      |    |       |    |   |         |    |
| 20.7  | 46.5 | 26.7  | 42.7    |    |       |    |   |         |    |
| 18.3  | 58   | 26.1  | 54      |    |       |    |   |         |    |
| 46.4  | 41.8 | 38    | 40.5    |    |       |    |   |         |    |
| 47.6  |      | 43.5  |         |    |       |    |   |         |    |
| 40.5  |      | 47.2  |         |    |       |    |   |         |    |

4n:

| The # | SI    | #     | Rorc-cr | The # | LI | # | Rorc-cr | LI |
|-------|-------|-------|---------|-------|----|---|---------|----|
| 28.5  | 23    | 25    | 19.9    |       |    |   |         |    |
| 36.2  | 24.9  | 28    | 24      |       |    |   |         |    |
| 33.2  | 40.2  | 27.8  | 37.6    |       |    |   |         |    |
| 28.3  | 36.2  | 24.8  | 32      |       |    |   |         |    |
| 33.2  | 23.76 | 30.3  | 20.67   |       |    |   |         |    |
| 31.6  | 29.67 | 30.1  | 23.88   |       |    |   |         |    |
| 21.08 | 23.2  | 19.08 | 16.36   |       |    |   |         |    |
|       |       | 24.5  |         |       |    |   |         |    |
|       |       | 14.14 |         |       |    |   |         |    |

4o:

| age (W) | The # |      |      |      |      |      | The # Rorc-cr |       |       |      |     |      |      |
|---------|-------|------|------|------|------|------|---------------|-------|-------|------|-----|------|------|
| 1       | 18.8  | 14.7 | 15.3 | 10.9 | 6    | 4.6  | 5.7           | 10.17 | 15.17 | 11.3 | 5.3 | 3.4  | 7.2  |
| 4       | 15.8  | 15.7 | 13.8 | 7.5  | 6.82 | 6.31 | 5.14          | 10.1  | 14    | 14.4 | 7.5 | 10.3 | 3.85 |

4p:

| age (W) | The # |       |       |       |      |      | The # Rorc-cr |      |      |      |      |      |      |
|---------|-------|-------|-------|-------|------|------|---------------|------|------|------|------|------|------|
| 1       | 8.13  | 12.27 | 11.63 | 10.84 | 8.6  | 5.7  | 9.2           | 8.28 | 13   | 6.9  | 7.1  | 7.8  | 11.4 |
| 4       | 4.21  | 3.61  | 2.48  | 3.96  | 4.22 | 2.66 | 2.7           | 4.69 | 4.01 | 3.9  | 6.93 | 3.95 | 2.84 |
| 6       | 1.7   | 3.74  | 1.91  | 3.92  | 2.12 | 5.82 | 3.93          | 4.48 | 9.05 | 1.79 | 6.8  | 3.16 |      |

4s:

| Req1-2 | The # | SI   | #    | Rorc-cr | The # | LI | # | Rorc-cr | LI |
|--------|-------|------|------|---------|-------|----|---|---------|----|
|        | 47.8  | 7.32 | 26.8 | 7.46    |       |    |   |         |    |
|        | 48.4  | 9.67 | 31.5 | 7.51    |       |    |   |         |    |
|        | 46.9  | 9.06 | 34.9 | 7.29    |       |    |   |         |    |
|        | 50.3  | 10.8 | 29.4 | 9.96    |       |    |   |         |    |
|        | 45    | 8.52 | 34.5 | 9.73    |       |    |   |         |    |
|        | 46.2  | 7.35 | 34.7 | 9.5     |       |    |   |         |    |
|        | 51.8  |      | 34.4 |         |       |    |   |         |    |

4t:

| The # | SI   | #    | Col-d-cr | The # | LI | # | Col-d-cr | LI |
|-------|------|------|----------|-------|----|---|----------|----|
| 45    | 49.6 | 24.4 | 28.6     |       |    |   |          |    |
| 46.7  | 45   | 24.1 | 32       |       |    |   |          |    |
| 41.3  | 39   | 24.4 | 21       |       |    |   |          |    |
| 34.9  | 49.5 | 28.2 | 18.8     |       |    |   |          |    |
| 40.6  | 48.3 | 17.6 | 18.5     |       |    |   |          |    |
|       | 42   | 38.6 | 24.6     |       |    |   |          |    |
| 48.9  |      | 25.7 |          |       |    |   |          |    |
| 40.8  |      | 15.9 |          |       |    |   |          |    |
