# Supplementary material
Source: PubMed Central journal article supplement (PMC11256193)
Supplement: NIHMS2007062-supplement-Source_Data_Extended_Data_Fig__5.pdf [file NIHMS2007062-supplement-Source_Data_Extended_Data_Fig__5.pdf]

| Sb   | The fit  |          |          |         |         |          |          |          |          |         | The fit Rancore |         |          |     |     |     |     |     |     |     |
|------|----------|----------|----------|---------|---------|----------|----------|----------|----------|---------|-----------------|---------|----------|-----|-----|-----|-----|-----|-----|-----|
| Days | 100      | 100      | 100      | 100     | 100     | 100      | 100      | 100      | 100      | 100     | 100             | 100     | 100      | 100 | 100 | 100 | 100 | 100 | 100 | 100 |
| 0    |          |          |          |         |         |          |          |          |          |         |                 |         |          |     |     |     |     |     |     |     |
| 1    | 97.81421 | 97.70992 | 98.8806  | 99.1632 | 103.621 | 96.75926 | 98.81657 | 98.97969 | 94.62366 | 97.6471 | 97.6686         | 98.0952 | 98.65276 |     |     |     |     |     |     |     |
| 2    | 96.72131 | 99.23664 | 100      | 99.3724 | 104.869 | 96.11111 | 97.86992 | 99.94694 | 96.23656 | 97.0588 | 96.5862         | 98.4762 | 99.13081 |     |     |     |     |     |     |     |
| 3    | 95.84699 | 97.25191 | 100.7463 | 99.5816 | 104.869 | 96.75926 | 99.40828 | 99.4698  | 95.69892 | 96.4706 | 96.5862         | 98.0952 | 98.00087 |     |     |     |     |     |     |     |
| 4    | 97.37705 | 97.70992 | 100.8209 | 99.749  | 104.182 | 96.89815 | 99.40828 | 100      | 95.05376 | 96.2941 | 94.9209         | 96.8095 | 98.26163 |     |     |     |     |     |     |     |
| 5    | 96.39344 | 98.47326 | 99.47761 | 99.1632 | 103.624 | 96.38889 | 96.28402 | 98.07347 | 96.1628  | 95.9412 | 95.3789         | 94.0952 | 98.17471 |     |     |     |     |     |     |     |
| 6    | 97.75966 | 100      | 99.32836 | 99.6653 | 103.621 | 97.22222 | 99.40828 | 100.1102 | 94.62366 | 95.0588 | 96.046          | 95.7143 | 98.26163 |     |     |     |     |     |     |     |
| 7    | 97.70492 | 99.38931 | 97.76119 | 100.418 | 104.245 | 99.58333 | 99.88166 | 100.3081 | 91.66667 | 94.4706 | 95.9617         | 90.9524 | 93.69839 |     |     |     |     |     |     |     |
| 8    | 97.37705 | 98.32061 | 99.32836 | 100.502 | 103.184 | 100.0926 | 99.64497 | 98.11224 | 90.69892 | 94.5294 | 94.0466         | 88.3333 | 90.39548 |     |     |     |     |     |     |     |
| 9    | 97.26776 | 98.47326 | 98.0597  | 100.209 | 102.497 | 100.1852 | 99.82249 | 97.85306 | 88.92473 | 92.1177 | 92.2981         | 84.0952 | 84.96306 |     |     |     |     |     |     |     |
| 10   | 97.9235  | 98.24427 | 97.91045 | 101.339 | 104.057 | 99.53704 | 100.2367 | 97.2449  | 88.01075 | 87.8824 | 90.9659         | 79.7619 | 83.13777 |     |     |     |     |     |     |     |
| 11   | 97.15847 | 99.31298 | 97.31343 | 101.799 | 103.745 | 101.3889 | 100.8284 | 98.46939 | 87.04301 | 83.7059 | 89.592          | 78.9048 | 79.7914  |     |     |     |     |     |     |     |
| 12   | 96.72131 | 99.54198 | 97.61194 | 103.264 | 106.117 | 101.8519 | 101.1834 | 100.5102 | 87.09677 | 79.4706 | 88.2598         | 78.0476 | 77.40113 |     |     |     |     |     |     |     |

| Sb   | day 4   |                 |         |               | day 9   |               |         |               |
|------|---------|-----------------|---------|---------------|---------|---------------|---------|---------------|
| Days | The fit | The fit Rancore | The fit | c fit Rancore | The fit | c fit Rancore | The fit | c fit Rancore |
| 0    |         |                 |         |               |         |               |         |               |
| 1    | 9.9     | 3.64            | 35.7    | 8.21          |         |               |         |               |
| 2    | 11.2    | 3.54            | 29.9    | 11            |         |               |         |               |
| 3    | 10.8    | 3.42            | 51.8    | 8.73          |         |               |         |               |
| 4    | 11.2    | 3.73            | 23.1    | 12.7          |         |               |         |               |
| 5    | 8.53    |                 | 44.8    |               |         |               |         |               |
| 6    | 14.9    |                 | 23.8    |               |         |               |         |               |
| 7    | 17.8    |                 |         |               |         |               |         |               |
| 8    | 12.2    |                 |         |               |         |               |         |               |

| Sb | Days | ce | ckO |
|----|------|----|-----|
| 1  | 0    | 0  | 0   |
| 2  | 0    | 0  | 0   |
| 3  | 0    | 0  | 0   |
| 4  | 0    | 0  | 0   |
| 5  | 0    | 0  | 0   |
| 6  | 0    | 0  | 0   |
| 7  | 0    | 0  | 0   |
| 8  | 0    | 0  | 0   |
| 9  | 0    | 0  | 0   |
| 10 | 0    | 0  | 0   |
| 11 | 0    | 0  | 0   |
| 12 | 0    | 0  | 0   |
| 12 | 0    | 0  | 0   |
| 12 | 0    | 0  | 0   |
| 12 | 0    | 0  | 0   |
| 12 | 0    | 0  | 0   |
| 12 | 0    | 0  | 0   |
| 12 | 0    | 0  | 0   |
| 12 | 0    | 0  | 0   |
| 12 | 0    | 0  | 0   |
| 10 | 1    |    |     |
| 11 | 1    |    |     |
| 12 | 1    |    |     |
| 12 | 0    |    |     |
| 12 | 0    |    |     |

1=death; 0=live

| Sb   | *Fe_Sf | *Fe_Sf | *Fe_Lf | *Fe_Lf |
|------|--------|--------|--------|--------|
| 22.4 | 9.6    | 11.2   | 8.92   |        |
| 29.9 | 7.22   | 12.6   | 4.88   |        |
| 31.3 | 7.52   | 16.4   | 9.69   |        |
| 16.8 | 6.29   | 20     | 7.8    |        |
| 15   | 5.39   | 19     | 8.4    |        |
|      | 7.17   |        | 6.9    |        |
|      | 6.12   |        | 7.16   |        |

| Sf    | The fit | SI    | The fit Rancore | S | The fit | LI | The fit Rancore | LI |
|-------|---------|-------|-----------------|---|---------|----|-----------------|----|
| 13946 | 5089    | 22695 | 7324            |   |         |    |                 |    |
| 13481 | 4832    | 19815 | 7670            |   |         |    |                 |    |
| 8640  | 5174    | 14168 | 7912            |   |         |    |                 |    |

| Sf  | The fit | SI   | The fit Rancore | The fit | LI | The fit Rancore | LI |
|-----|---------|------|-----------------|---------|----|-----------------|----|
| 666 | 1006    | 1677 | 2111            |         |    |                 |    |
| 766 | 2489    | 1912 | 2262            |         |    |                 |    |
| 941 | 1553    | 1395 | 2464            |         |    |                 |    |
| 751 | 1793    | 1413 | 1881            |         |    |                 |    |
| 817 | 1547    |      |                 |         |    |                 |    |
| 895 | 1509    |      |                 |         |    |                 |    |

| Sf  | The fit | SI  | The fit Rancore | The fit | LI | The fit Rancore | LI |
|-----|---------|-----|-----------------|---------|----|-----------------|----|
| 303 | 1013    | 264 | 864             |         |    |                 |    |
| 256 | 1001    | 228 | 909             |         |    |                 |    |
| 359 | 1208    | 250 | 871             |         |    |                 |    |
| 188 | 1208    | 190 | 871             |         |    |                 |    |
| 210 | 471     | 187 | 879             |         |    |                 |    |
| 183 |         | 179 |                 |         |    |                 |    |

| Sf   | *Fe  | The fit | *Fe  | The fit | *Fe | The fit Rancore | *Fe | The fit Rancore |
|------|------|---------|------|---------|-----|-----------------|-----|-----------------|
| 4.77 | 5.28 | 1.46    | 3.26 |         |     |                 |     |                 |
| 4.42 | 4.42 | 1.32    | 3.51 |         |     |                 |     |                 |
| 4.98 | 4.5  | 1.72    | 2.96 |         |     |                 |     |                 |

| Sf      | *Fe     | The fit | *Fe     | The fit | *Fe | The fit Rancore | *Fe | The fit Rancore |
|---------|---------|---------|---------|---------|-----|-----------------|-----|-----------------|
| 2407.63 | 2821.35 | 1707.64 | 2460.27 |         |     |                 |     |                 |
| 2491.77 | 2953.9  | 1717.89 | 2443.13 |         |     |                 |     |                 |
| 2472.91 | 2801.78 | 1734.27 | 3261.9  |         |     |                 |     |                 |

| Sf      | *Fe     | The fit | *Fe     | The fit | *Fe | The fit Rancore | *Fe | The fit Rancore |
|---------|---------|---------|---------|---------|-----|-----------------|-----|-----------------|
| 2407.63 | 2821.35 | 1707.64 | 2460.27 |         |     |                 |     |                 |
| 2491.77 | 2953.9  | 1717.89 | 2443.13 |         |     |                 |     |                 |
| 2472.91 | 2801.78 | 1734.27 | 3261.9  |         |     |                 |     |                 |
