# Supplementary material
Source: PubMed Central journal article supplement (PMC11256193)
Supplement: NIHMS2007062-supplement-Source_Data_Extended_Data_Fig__6.pdf [file NIHMS2007062-supplement-Source_Data_Extended_Data_Fig__6.pdf]

| 6c:  |      |        |      |        |        |         |          |         |          |      |       |       |
|------|------|--------|------|--------|--------|---------|----------|---------|----------|------|-------|-------|
| Car1 | Cav0 | Col163 | Lip1 | Mtd17c | Scars6 | Slc11a2 | Slc22a17 | Slc39a8 | Slc39a14 | Ttrc | Timd2 | Trop6 |
| 0.92 | 0.09 | 0.01   | 0.72 | 0.04   | 0.2    | 48.38   | 0.55     | 9.9     | 10.92    | 8.56 | 0     | 2.58  |
| 0.72 | 0.12 | 0.01   | 0.75 | 0.01   | 0.03   | 42.94   | 0.51     | 9.54    | 11.26    | 9.02 | 0     | 3.36  |
| 1.57 | 0.15 | 0.03   | 0.73 | 0      | 0.06   | 44.08   | 0.48     | 10.4    | 11.37    | 8.7  | 0     | 2.99  |

| 6c:       |           |                    |          |
|-----------|-----------|--------------------|----------|
| Slc39a14  | Slc39a8   | Zip14 f/f Rorc-cre |          |
| Zip14 f/f | Zip14 f/f | Zip14 f/f          | Rorc-cre |
| 0.965804  | 0.571782  | 0.95964            | 0.83143  |
| 1.051147  | 0.529818  | 0.89661            | 0.72598  |
| 0.989296  | 0.534695  | 1.18223            | 1.029676 |

| 6c:          |              |             |             |             |             |  |  |
|--------------|--------------|-------------|-------------|-------------|-------------|--|--|
| Slc39a14-DFO | Slc39a14-DFO | Slc39a8-DFO | Slc39a8-DFO | Slc11a2-DFO | Slc11a2-DFO |  |  |
| 27.23        | 31.56        | 19.72       | 17.98       | 25.86       | 26.56       |  |  |
| 18.58        | 37.5         | 18.77       | 17.39       | 24.62       | 27.11       |  |  |
| 16.01        | 35.81        | 18.29       | 17.96       | 22.43       | 26.94       |  |  |

| 6h:                |                             |  |  |
|--------------------|-----------------------------|--|--|
| Ttrc f/f Zip14 f/f | Ttrc f/f Zip14 f/f Rorc-cre |  |  |
| 0.962951           | 0.907870                    |  |  |
| 0.780095           | 0.911511                    |  |  |
| 1.331213           | 0.970898                    |  |  |

| 6i:                |                             |  |  |
|--------------------|-----------------------------|--|--|
| Ttrc f/f Zip14 f/f | Ttrc f/f Zip14 f/f Rorc-cre |  |  |
| 1.002347           | 0.75614                     |  |  |
| 1.08089            | 0.905282                    |  |  |
| 0.854096           | 0.699276                    |  |  |
