# Supplementary material
Source: PubMed Central journal article supplement (PMC11256193)
Supplement: NIHMS2007062-supplement-Source_Data_Extended_Data_Fig__7.pdf [file NIHMS2007062-supplement-Source_Data_Extended_Data_Fig__7.pdf]

| Tic      | Tic      | Tic | Ret | Ret |
|----------|----------|-----|-----|-----|
| 5.872259 | 7.139649 |     |     |     |
| 7.016249 | 6.974948 |     |     |     |
| 6.02961  | 6.577331 |     |     |     |
| 6.32779  | 6.169942 |     |     |     |
| 6.043264 | 6.59382  |     |     |     |
| 6.122352 | 5.893309 |     |     |     |
| 6.229573 |          |     |     |     |

| Tic     | Tic      | Tic | Ret | Ret |
|---------|----------|-----|-----|-----|
| 0.00177 | 0.000701 |     |     |     |
| 0.00194 | 0.000897 |     |     |     |
| 0.00057 | 0.001972 |     |     |     |
| 0.00094 | 0.001158 |     |     |     |
| 0.00037 | 0.000514 |     |     |     |
| 0.00115 | 0.000647 |     |     |     |
| 0.00045 |          |     |     |     |

| Tic      | c       | Ret | Ret |
|----------|---------|-----|-----|
| 0.000485 | 0.00059 |     |     |
| 0.001936 | 0.00055 |     |     |
| 0.001587 | 0.0004  |     |     |
| 0.000546 | 0.00045 |     |     |
| 0.000573 | 0.00027 |     |     |
| 0.000606 | 0.00004 |     |     |
| 0.000486 |         |     |     |

| SPF  | GF   | SPF  | GF   |
|------|------|------|------|
| 9.53 | 23.7 | 11.2 | 9.11 |
| 10.8 | 23.5 | 11.4 | 11.3 |
| 10.2 | 15.4 | 9.86 | 7.12 |
| 9.99 | 14.1 | 7.06 | 7.89 |
| 10.4 | 16.4 | 7.2  | 11   |
| 9.34 | 16.1 | 7.82 | 12.5 |
| 10.4 | 14.3 | 15.1 | 11   |

| SPF  | GF   | SPF  | GF   |
|------|------|------|------|
| 23.4 | 19.2 | 19.1 | 17   |
| 17.7 | 17.9 | 31.9 | 17.6 |
| 21.4 | 19.6 | 29   | 19.4 |
| 20.5 | 22.6 | 12.2 | 20.7 |
| 27.6 | 20.2 | 14.9 | 21.6 |
| 26.9 | 1.97 | 10.7 | 4.34 |
| 10.2 | 1.7  | 73   | 4.82 |

| Ahr  | c    | Ahr  | c    | Ahr | c |
|------|------|------|------|-----|---|
| 9.02 | 15.9 | 18.7 | 23.8 |     |   |
| 12.7 | 20.2 | 22.1 | 16.8 |     |   |
| 12.1 | 17.2 | 17.6 | 33.7 |     |   |
| 11.7 | 16.6 | 26   | 23.9 |     |   |
| 10.1 | 22.9 | 32.3 | 14.2 |     |   |
| 8.36 | 15.3 | 16   | 28   |     |   |
| 11.9 | 32.9 | 25.2 | 29.4 |     |   |
| 10.5 | 25.5 | 21   | 24.7 |     |   |
| 11.6 | 16.1 |      |      |     |   |
| 7.07 | 16.4 |      |      |     |   |

| Ahr   | c     | Ahr   | c     | Ahr | c |
|-------|-------|-------|-------|-----|---|
| 38.75 | 24.3  | 30.32 | 29.39 |     |   |
| 30.65 | 24.59 | 17    | 10.58 |     |   |
| 36.62 | 15.4  | 20    | 11.3  |     |   |
| 34.9  | 24.35 | 17.6  | 15.66 |     |   |
| 38.5  | 22.21 | 28.1  | 22.55 |     |   |
| 31.3  | 19.24 | 29.2  |       |     |   |
| 33.6  | 18.2  | 27.8  |       |     |   |
| 35.7  |       |       |       |     |   |

| Ahr       | c         | Ahr       | c         | Ahr | c |
|-----------|-----------|-----------|-----------|-----|---|
| 1.300223  | 0.206465  | 0.1973398 |           |     |   |
| 1.373486  | 0.26567   | 0.4377311 | 0.274319  |     |   |
| 0.5599614 | 0.0863739 | 0.3468227 | 0.3761601 |     |   |

| Ahr       | c          | Ahr       | c         | Ahr | c |
|-----------|------------|-----------|-----------|-----|---|
| 1.166057  | 0.02603219 | 0.279021  | 0.0530454 |     |   |
| 0.9984316 | 0.01593471 | 0.4077261 | 0.0084048 |     |   |
| 0.8589382 | 0.01318874 | 0.3325151 | 0.0181425 |     |   |

| Ahr       | c          | Ahr       | c           | Ahr | c |
|-----------|------------|-----------|-------------|-----|---|
| 1.166057  | 0.02603219 | 0.279021  | 0.05304537  |     |   |
| 0.9984316 | 0.01593471 | 0.4077261 | 0.008404766 |     |   |
| 0.8589382 | 0.01318874 | 0.3325151 | 0.01814253  |     |   |
