# Supplementary material
Source: PubMed Central journal article supplement (PMC11256193)
Supplement: NIHMS2007062-supplement-Source_Data_Extended_Data_Fig__8.pdf [file NIHMS2007062-supplement-Source_Data_Extended_Data_Fig__8.pdf]

Ba:

| Ahr/+ Th1 LI | Ahr/- Th1 LI | Ahr/+ Th1 SI | Ahr/- Th1 SI |
|--------------|--------------|--------------|--------------|
| 22.6         | 25.6         | 21.5         | 22.4         |
| 22           | 24.2         | 35.2         | 22.5         |
| 23.4         | 28.1         | 33.2         | 18.5         |
| 25.7         | 24.5         | 25           | 19.4         |
| 18.6         | 23           |              |              |
| 22           | 22           |              |              |
| 21.1         |              |              |              |
| 17           |              |              |              |

Bb:

| Ahr/+ Th2 LI | Ahr/- Th2 LI | Ahr/+ Th2 SI | Ahr/- Th2 SI |
|--------------|--------------|--------------|--------------|
| 16.6         | 27.7         | 14.7         | 45.7         |
| 16.8         | 51.8         | 20.5         | 47.2         |
| 17.2         | 44           | 19.7         | 16.3         |
| 25           | 34.1         | 5.83         | 14           |
| 20.3         | 18           |              |              |
| 10.5         | 22.5         |              |              |
| 14.2         |              |              |              |
| 13.9         |              |              |              |

Bc:

| Ahr/+ Th17 LI | Ahr/- Th17 LI | Ahr/+ Th17 SI | Ahr/- Th17 SI |
|---------------|---------------|---------------|---------------|
| 27.9          | 32.6          | 19.4          | 23.4          |
| 28.7          | 16.2          | 20.1          | 22.7          |
| 26.1          | 23.4          | 19.5          | 10.3          |
| 24.4          | 22.5          | 10.6          | 8.2           |
| 28.9          | 22.6          |               |               |
| 24.2          | 29.8          |               |               |
| 23.6          |               |               |               |
| 21.1          |               |               |               |

Bd:

| Ahr/+ Treg LI | Ahr/- Treg LI | Ahr/+ Treg SI | Ahr/- Treg SI |
|---------------|---------------|---------------|---------------|
| 32.7          | 41.2          | 24.44         | 29.64         |
| 36.6          | 28.6          | 30.56         | 31.5          |
| 33.9          | 43            | 28.9          | 19            |
| 34.3          | 36.1          | 12.5          | 20.1          |
| 33.8          | 31.8          |               |               |
| 31            | 38.3          |               |               |
| 31.9          |               |               |               |
| 30.9          |               |               |               |

Be:

| Ahr/+ DC SI | Ahr/- DC SI | Ahr/+ DC LI | Ahr/- DC LI |
|-------------|-------------|-------------|-------------|
| 72.7        | 70.9        | 54.4        | 53.3        |
| 45          | 72.2        | 53.7        | 50.6        |
| 57.5        | 69.2        | 48          | 52.5        |
| 69.7        | 58.2        | 50.5        | 45.5        |

Bf:

| Ahr/+ mac SI | Ahr/- mac SI | Ahr/+ mac LI | Ahr/- mac LI |
|--------------|--------------|--------------|--------------|
| 67.2         | 62.9         | 21.9         | 19.7         |
| 33.3         | 73.9         | 10.8         | 19           |
| 66.9         | 73.8         | 19.3         | 19.8         |
| 72.7         | 54.7         | 15.3         | 23.2         |

Bg:

| Ahr/+ LI | Ahr dCAIR/+ LI | Ahr dCAIR/- LI | Ahr/+ SI | Ahr dCAIR/+ SI | Ahr dCAIR/- SI |
|----------|----------------|----------------|----------|----------------|----------------|
| 39.9     | 33.4           | 38.6           | 24.6     | 21.9           | 23.3           |
| 29.3     | 38             | 41.7           | 20.1     | 22.3           | 20             |
| 44.1     | 45.7           | 44             | 21       | 23.7           | 30.7           |
| 24.6     | 40.4           | 39.8           | 18.5     | 20             | 21             |
| 15.9     | 25.6           | 32.9           | 26.1     | 14.7           | 14.3           |
| 14.8     | 14.1           | 29.5           | 22.4     | 25.6           | 18.9           |
|          | 11.6           | 12.4           |          | 20.7           | 22.3           |
|          |                | 11.1           |          |                | 21.5           |

Bi:

| Ahr/+ LI | Ahr dCAIR/+ LI | Ahr dCAIR/- LI | Ahr/+ SI | Ahr dCAIR/+ SI | Ahr dCAIR/- SI |
|----------|----------------|----------------|----------|----------------|----------------|
| 15.9     | 14             | 13.1           | 18.9     | 22.7           | 18.5           |
|          |                | 12.9           | 12.1     | 16             | 18.1           |
|          |                | 16.1           | 16.9     | 16.4           | 23.4           |
|          |                | 14.7           | 19.9     | 9.69           | 23.4           |
|          |                | 18.8           | 8.29     | 24.8           | 21.9           |
|          |                | 6.58           | 5.65     | 18.9           | 7.64           |
|          |                |                | 4.67     | 7.61           | 9.4            |
|          |                |                |          | 6.88           | 17             |

Bj:

| Ahr/+ LI | Ahr dCAIR/+ LI | Ahr dCAIR/- LI | Ahr/+ SI | Ahr dCAIR/+ SI | Ahr dCAIR/- SI |
|----------|----------------|----------------|----------|----------------|----------------|
| 17.7     | 27.4           | 21.1           | 35.9     | 27             | 20             |
|          |                | 32.7           | 30       | 15.4           | 45.7           |
|          |                | 39.9           | 25.2     | 22.7           | 33.9           |
|          |                | 37.7           | 19.7     | 16.6           | 41.7           |
|          |                | 34.7           | 25.5     | 30             | 40.1           |
|          |                | 24.2           | 26.5     | 39             | 34.6           |
|          |                |                | 39       |                | 68.9           |
|          |                |                | 38.8     |                | 66.4           |

Bk:

| Ahr/+ -IL-1b/2 | Ahr/+ -IL-1b/23 | Ahr/- -IL-1b/23 | Ahr/- -IL-1b/23 |
|----------------|-----------------|-----------------|-----------------|
| 11.8           | 13.8            | 31              | 27.1            |
| 8.47           | 12.4            | 38              | 32.7            |
| 9.85           | 13              | 25              | 24.8            |
| 7.94           | 12.5            | 41              | 39.9            |
| 15.9           | 18.2            | 33.2            | 33              |
| 11.4           | 17              | 39              | 43              |
| 14.5           | 14.7            | 37              | 39              |
| 11.7           | 17.2            | 34              | 32.3            |
| 12.4           | 16.4            |                 |                 |
| 10.5           | 16              |                 |                 |

Bl:

| Ahr/+ -IL-1b/23 | Ahr/+ -IL-1b/23 |
|-----------------|-----------------|
| 94.8            | 94.2            |
| 104             | 97.4            |
| 101             | 96.1            |
| 100             | 89.7            |
| 102             | 96.1            |
| 101             | 87.7            |
| 97.5            | 84.8            |
| 201             | 185             |
| 197             | 182             |
| 196             | 178             |
| 172             | 160             |
| 151             | 150             |
| 153             | 152             |

Bm:

| -IL-1b/23 | +IL-1b/23 |
|-----------|-----------|
| 1.062499  | 1.760218  |
| 0.939399  | 1.624233  |
| 0.998102  | 1.594137  |
| 0.875353  | 1.516139  |
| 1.071925  | 1.468771  |
| 1.052722  | 1.664128  |

Bn:

| -IL-1b/23 | +IL-1b/23 |
|-----------|-----------|
| 0.985873  | 0.368351  |
| 1.01892   | 0.369514  |
| 0.995208  | 0.365085  |
| 0.866224  | 0.32276   |
| 1.042703  | 0.355498  |
| 1.091073  | 0.465502  |

Bo:

| -IL-1b/23 | +IL-1b/23 |
|-----------|-----------|
| 1.029447  | 0.64015   |
| 0.960251  | 0.781122  |
| 1.010302  | 0.743146  |
| 0.89205   | 0.646824  |
| 0.951344  | 0.716804  |
| 1.156606  | 0.738303  |

Bp:

| Ahr/+ SI | Ahr/- SI | Ahr/+ LI | Ahr/- LI |
|----------|----------|----------|----------|
| 9.88     | 12.7     | 11.1     | 19       |
| 9.36     | 13.3     | 9.88     | 17.3     |
| 8.88     | 15.9     | 6.6      | 21.1     |

Bq:

| Ahr/+ SI | Ahr/- SI | Ahr/+ LI | Ahr/- LI |
|----------|----------|----------|----------|
| 15.1     | 14.7     | 9.94     | 14.6     |
| 8.07     | 8.56     | 13.7     | 14.4     |
| 12.5     | 15       | 6.18     | 8.49     |

Bv:

|    | Ahr/+ Cd4-cm | Ahr/- Cd4-cm |
|----|--------------|--------------|
| SI | 9.56         | 9.24         |
| LI | 8.15         | 10.7         |

Bw:

| Ahr CAIR/+ SI | Ahr CAIR/+ RORc-cm SI | Ahr CAIR/+ LI | Ahr CAIR/+ RORc-cm LI |
|---------------|-----------------------|---------------|-----------------------|
| 26420         | 57739.5               | 20366.67      | 32240                 |
| 29510         | 56279.17              | 22871.33      | 36250.5               |
| 18377.02      | 63882                 | 30387.5       | 36393.5               |
| 21234.85      | 54721.33              | 21580         | 35266                 |
| 17453.8       | 51337                 | 23345.83      | 32855.33              |

Bx:

| Ahr CAIR/+ SI | Ahr CAIR/+ RORc-cm SI | Ahr CAIR/+ LI | Ahr CAIR/+ RORc-cm LI |
|---------------|-----------------------|---------------|-----------------------|
| 9755.2        | 11334.05              | 20366.67      | 37277.5               |
| 12000.73      | 11255.83              | 26390         | 40644.5               |
| 8052.85       | 9464                  | 29172         | 41907.67              |
| 6067.1        | 9949.333              | 28773.33      | 35256                 |
| 5610.15       | 8633.96               | 24279.67      | 29956.33              |
