# Supplementary material
Source: PubMed Central journal article supplement (PMC11256193)
Supplement: NIHMS2007062-supplement-Source_Data_Extended_Data_Fig__9.pdf [file NIHMS2007062-supplement-Source_Data_Extended_Data_Fig__9.pdf]

gk:

| Ahrs/+ | Ahrs/- | Ahrs/+ +iron | Ahrs/- +iron |
|--------|--------|--------------|--------------|
| 17.6   | 3.96   | 16.6         | 4.87         |
| 14.4   | 4.97   | 14.4         | 4.73         |
| 12.8   | 4.89   | 14.4         | 6.28         |
| 17.4   | 4.67   | 20.3         | 5.81         |
| 13.9   | 4.84   | 18.4         | 5.73         |
| 14.7   |        | 15.6         | 5.45         |
| 15.6   |        | 14.3         |              |
|        |        | 15.7         |              |

gk:

| Ahrs/+  | Ahrs/-   | Ahrs/+ +iron | Ahrs/- +iron |
|---------|----------|--------------|--------------|
| 108637  | 30420    | 106769       | 14590.33     |
| 135841  | 30272.67 | 91390        | 24006.67     |
| 86078.7 | 27716    | 60939.67     | 19322.33     |
| 124222  | 23610.17 | 92211.17     | 25083.5      |
| 94185   | 17506.67 | 64053.17     | 23469.33     |
| 64651.2 |          | 51547.17     | 24414        |
| 79170   |          | 63155.08     |              |
|         |          | 64792        |              |

gk:

| Ahrs/+ | Ahrs/- | Ahrs/+ +iron | Ahrs/- +iron |
|--------|--------|--------------|--------------|
| 37     | 33     | 31           | 46           |
| 33     | 26.5   | 40           | 43           |
| 33     | 22     | 37           | 30           |
| 48     | 23.6   | 32.7         | 21.1         |
| 39.8   | 20.4   | 36.5         | 26           |
| 31.8   |        | 33           | 30.5         |
| 39     |        | 36.3         |              |
|        |        | 28.4         |              |

gk:

| Ahrs/+ | Ahrs/- | Ahrs/+ +iron | Ahrs/- +iron |
|--------|--------|--------------|--------------|
| 29.4   | 18     | 13.8         | 21.6         |
| 15.1   | 23.6   | 21.5         | 20.8         |
| 15.4   | 21.9   | 20.2         | 29.1         |
| 23.9   | 22.8   | 29           | 26           |
| 30.8   | 17.5   | 28           | 22           |
|        |        | 28.8         | 17.94        |
| 29.2   |        | 31           |              |
|        |        | 30           |              |

gk:

| Ahr ff | Ahr ff Rorc-cis | Ahr ff +iron | Ahr ff Rorc-cis+iron |
|--------|-----------------|--------------|----------------------|
| 16.1   | 11.8            | 23.8         | 13.1                 |
| 19     | 9.5             | 18.1         | 9.9                  |
| 19.3   | 11              | 20.8         | 12.2                 |
| 16.9   | 10.5            | 20.7         | 5.93                 |
| 15.4   | 7.83            | 15.3         | 8.86                 |
| 17     | 9.05            |              | 14.6                 |

gk:

| Ahr ff | Ahr ff Rorc-cis | Ahr ff +iron | Ahr ff Rorc-cis+iron |
|--------|-----------------|--------------|----------------------|
| 116835 | 19210.75        | 157692.2     | 101608               |
| 133339 | 26000           | 118009.7     | 5921.67              |
| 166667 | 24929.67        | 118216.6     | 79514.5              |
| 125866 | 19710.17        | 86588.67     | 64837.5              |
| 117784 | 42029           | 107068       | 35311.25             |
| 145416 | 59860           |              | 80686.67             |

gk:

| Ahr ff | Ahr ff Rorc-cis | Ahr ff +iron | Ahr ff Rorc-cis+iron |
|--------|-----------------|--------------|----------------------|
| 116835 | 19210.75        | 157692.2     | 101608               |
| 133339 | 26000           | 118009.7     | 5921.67              |
| 166667 | 24929.67        | 118216.6     | 79514.5              |
| 125866 | 19710.17        | 86588.67     | 64837.5              |
| 117784 | 42029           | 107068       | 35311.25             |
| 145416 | 59860           |              | 80686.67             |

gk:

| Ahr ff  | Ahr ff Rorc-cis | Ahr ff Rorc-cis+iron |
|---------|-----------------|----------------------|
| 352.941 | 58.82353        | 176.4706             |
| 411.765 | 58.82353        | 176.4706             |
| 294.118 | 117.6471        | 235.2941             |

gk:

| Ahr ff | Ahr ff Rorc-cis | Ahr ff +iron | Ahr ff Rorc-cis+iron |
|--------|-----------------|--------------|----------------------|
| 13     | 18.2            | 7.93         | 7.98                 |
| 2.49   | 19              | 7.75         | 6.38                 |
| 4.37   | 10.8            | 7.72         | 6.38                 |
| 7.86   | 17.6            | 16.9         | 5.87                 |
| 3.64   | 4.75            | 7.34         | 7.45                 |
| 6.16   | 3.28            |              | 10.6                 |
