# Supplementary material
Source: PubMed Central journal article supplement (PMC11256193)
Supplement: NIHMS2007062-supplement-Source_Data_Extended_Data_Fig__10.pdf [file NIHMS2007062-supplement-Source_Data_Extended_Data_Fig__10.pdf]

10x

|      | Ppg2-b + MIG |         |         | Ppg2-b-pTtc + MIG |         |         | Ppg2-b-pTtc + Atr |         |         | Ppg2-b-pTtcΔVRE + Atr |         |         |
|------|--------------|---------|---------|-------------------|---------|---------|-------------------|---------|---------|-----------------------|---------|---------|
| -FCZ | 0.86329      | 0.84873 | 0.8783  | 125.309           | 123.07  | 106.904 | 85.9182           | 86.9685 | 87.7744 | 109.283               | 109.63  | 112.107 |
| +FCZ | 1.09905      | 0.91797 | 0.67362 | 115.905           | 117.015 | 117.201 | 49.0814           | 55.397  | 54.2919 | 105.376               | 107.068 | 110.189 |
