# Supplementary material
Source: PubMed Central journal article supplement (PMC11256193)
Supplement: NIHMS2007062-supplement-Source_Data_Fig__2.pdf [file NIHMS2007062-supplement-Source_Data_Fig__2.pdf]

Fig. 2b

| DFQ (µM): c | 25   | 100  | 400  |
|-------------|------|------|------|
| 2180        | 5141 | 6421 | 7206 |
| 2144        | 4890 | 6238 | 7058 |
| 2112        | 4845 | 6285 | 6986 |
| 3900        | 4672 | 5751 | 6700 |
| 3718        | 4491 | 5666 | 6459 |
| 3630        | 4504 | 5390 | 6229 |

Fig. 2d

| DFQ (µM): 0 | 25  | 100 | 400 |
|-------------|-----|-----|-----|
| 612         | 501 | 436 | 451 |
| 589         | 496 | 432 | 452 |
| 570         | 489 | 430 | 439 |
| 613         | 582 | 559 | 551 |
| 589         | 581 | 542 | 539 |
| 574         | 589 | 558 | 527 |

Fig. 2f

| DFQ (µM): c | 25    | 100   | 400   |
|-------------|-------|-------|-------|
| 28.3        | 22.73 | 13    | 11.35 |
| 27.6        | 22.7  | 12.91 | 10.85 |
| 26.89       | 19.76 | 12.62 | 10.87 |
| 30.7        | 28.94 | 19.99 | 15.29 |
| 31.97       | 27.89 | 19.65 | 15.06 |
| 31.46       | 27.61 | 20.4  | 15.77 |

Fig. 2g

| DFQ (µM): 0 | 25   | 100  | 400  |
|-------------|------|------|------|
| 1.85        | 1.31 | 0.73 | 1.16 |
| 1.96        | 1.65 | 1.17 | 1.02 |
| 2.18        | 1.45 | 0.92 | 1.17 |
| 5.1         | 2.89 | 2.02 | 1.83 |
| 4.99        | 2.27 | 1.83 | 1.94 |
| 4.46        | 2.56 | 1.93 | 1.92 |

2i

| DFQ (µM): c | 6.25 | 25    | 100   |
|-------------|------|-------|-------|
| 6052        | 9103 | 19106 | 17063 |
| 6199        | 9292 | 19283 | 16972 |
| 6256        | 9287 | 19434 | 16904 |
| 6288        | 9514 | 19608 | 17802 |
| 5913        | 8176 | 16852 | 14219 |
| 5927        | 8207 | 17129 | 14254 |
| 5977        | 8274 | 17208 | 14045 |
| 6032        | 8326 | 17253 | 14081 |

2k

| DFQ (µM): 0 | 6.25 | 25  | 100 |
|-------------|------|-----|-----|
| 1756        | 1446 | 770 | 465 |
| 1778        | 1456 | 774 | 475 |
| 1789        | 1472 | 771 | 486 |
| 1794        | 1483 | 767 | 492 |
| 1437        | 1355 | 811 | 554 |
| 1437        | 1350 | 805 | 555 |
| 1441        | 1341 | 804 | 560 |
| 1436        | 1324 | 803 | 558 |

2m

| DFQ (µM): c | 6.25  | 25    | 100   |
|-------------|-------|-------|-------|
| 84.3        | 82.8  | 51.1  | 10.7  |
| 83.8        | 82.7  | 50.87 | 10.3  |
| 87          | 84.82 | 61    | 9.3   |
| 86.14       | 84.27 | 60.74 | 9.18  |
| 75.74       | 71.1  | 55.4  | 12.67 |
| 76.2        | 71.6  | 55.7  | 12.67 |
| 86.02       | 83.89 | 59.94 | 9.39  |
| 85.56       | 83.27 | 59.88 | 9     |

2o

| DFQ (µM): 0 | 6.25 | 25   | 100   |
|-------------|------|------|-------|
| 8.74        | 7.97 | 3.3  | 0.72  |
| 8.75        | 8.02 | 3.34 | 0.76  |
| 6.97        | 4.84 | 2.87 | 0.567 |
| 6.63        | 5.04 | 2.94 | 0.57  |
| 7.5         | 6.56 | 3.08 | 0.58  |
| 7.4         | 6.63 | 3.1  | 0.55  |
| 7.6         | 6.7  | 3.15 | 0.57  |
| 7.6         | 6.54 | 3.13 | 0.5   |
