# Supplementary material
Source: PubMed Central journal article supplement (PMC11256193)
Supplement: NIHMS2007062-supplement-Source_Data_Fig__3.pdf [file NIHMS2007062-supplement-Source_Data_Fig__3.pdf]

Fig. 3a:

| DFD (μM): 0 | 100   |
|-------------|-------|
| 8478        | 14863 |
| 8659        | 14980 |
| 8563        | 15080 |
| 8408        | 14498 |
| 8283        | 14840 |
| 8160        | 14887 |

Fig. 3b:

| DFD (μM): 0 | 100     |
|-------------|---------|
| 106.9061    | 78.7681 |
| 91.93023    | 65.1738 |
| 87.3104     | 61.5053 |

Fig. 3c:

| DFD (μM): 0 | 100     |
|-------------|---------|
| 146.5918    | 92.5492 |
| 132.1884    | 91.4156 |
| 121.6589    | 86.3269 |

Fig. 3d:

| DFD (μM): 0 | 100  |
|-------------|------|
| 597         | 1078 |
| 598         | 1051 |
| 578         | 1032 |
| 687         | 841  |
| 682         | 842  |
| 655         | 827  |
| 644         | 829  |
