# Supplementary material
Source: PubMed Central journal article supplement (PMC11256193)
Supplement: NIHMS2007062-supplement-Source_Data_Fig__4.pdf [file NIHMS2007062-supplement-Source_Data_Fig__4.pdf]

|                 |  | SI   |      |      |      |      |      |      |      |      |      | LI   |      |      |      |      | rLN  |      |      |      |      |      |      |      |
|-----------------|--|------|------|------|------|------|------|------|------|------|------|------|------|------|------|------|------|------|------|------|------|------|------|------|
| Tic ff          |  | 61.6 | 49.8 | 45   | 39.4 | 42.3 | 45.9 |      | 25.6 | 29.4 | 24.9 | 29.7 | 19.2 | 25   | 16.8 | 21.8 | 12.4 | 7.27 | 1.83 | 2.4  |      | 2.73 | 4.17 |      |
| Tic ff Rorc-crc |  | 17.1 | 22.5 | 18.7 | 13.4 | 11.6 | 12.7 | 16.1 | 17.2 | 15.4 | 15.7 | 12.8 | 15.2 | 6.55 | 9.48 | 16.8 | 4.09 | 11.3 | 5.19 | 3.61 | 2.16 | 2.13 | 9.42 | 4.53 |

| age (W) |  | Tic ff |      |      |      |      |      |      |    |      |      | Tic ff Rorc-crc |      |      |      |  |  |  |  |  |  |  |  |  |
|---------|--|--------|------|------|------|------|------|------|----|------|------|-----------------|------|------|------|--|--|--|--|--|--|--|--|--|
| 1       |  | 61.8   | 42.8 | 62.4 | 52.9 | 40.4 | 32.7 | 43.5 |    | 41.8 | 47.3 | 49.5            | 32.2 | 38.2 | 33.1 |  |  |  |  |  |  |  |  |  |
| 4       |  | 57.6   | 63.7 | 60.5 | 46.4 | 61.6 | 49.8 | 45   | 16 | 17.6 | 17.1 | 22.5            | 18.7 | 14.8 |      |  |  |  |  |  |  |  |  |  |

| age (W) |  | Tic ff |         |             |          |           |             |         |         |  |  | Tic ff Rorc-crc |  |  |  |  |  |  |  |  |  |  |  |  |
|---------|--|--------|---------|-------------|----------|-----------|-------------|---------|---------|--|--|-----------------|--|--|--|--|--|--|--|--|--|--|--|--|
| 1       |  | 20111  | 11784.5 | 30654       | 47842.17 | 28392     | 37483.33    | 36252.7 | 30558.7 |  |  |                 |  |  |  |  |  |  |  |  |  |  |  |  |
| 4       |  | 335712 | 182010  | 336183.4667 | 71791.2  | 30149.167 | 60038.33333 | 75800.2 | 46156.9 |  |  |                 |  |  |  |  |  |  |  |  |  |  |  |  |

| age (W) |  | Tic ff |      |      |      |      |      |      |      |      |      | Tic ff Rorc-crc |      |      |  |  |  |  |  |  |  |  |  |  |
|---------|--|--------|------|------|------|------|------|------|------|------|------|-----------------|------|------|--|--|--|--|--|--|--|--|--|--|
| 1       |  | 21.3   | 28.9 | 25.1 | 25.7 | 19.4 | 22   | 20.1 | 20   | 26.1 | 21.4 | 21.2            | 16.5 | 17.3 |  |  |  |  |  |  |  |  |  |  |
| 4       |  | 25     | 34   | 26   | 33.4 | 25.6 | 29.4 | 24.9 | 10.6 | 10.6 | 17.2 | 15.4            | 15.7 | 9.75 |  |  |  |  |  |  |  |  |  |  |
| 6       |  | 21.3   | 28.7 | 24.4 | 25.6 | 26.4 | 26.6 | 32.2 | 6.13 | 10.4 | 10.5 | 12.9            | 10.9 |      |  |  |  |  |  |  |  |  |  |  |

| age (W) |  | Tic ff   |         |          |          |           |             |         |         |  |  | Tic ff Rorc-crc |  |  |  |  |  |  |  |  |  |  |  |  |
|---------|--|----------|---------|----------|----------|-----------|-------------|---------|---------|--|--|-----------------|--|--|--|--|--|--|--|--|--|--|--|--|
| 1       |  | 16915.17 | 10059.3 | 10986.67 | 17230    | 20332     | 25111.86667 | 13205.8 | 18980   |  |  |                 |  |  |  |  |  |  |  |  |  |  |  |  |
| 4       |  | 89358.4  | 150585  | 106935.7 | 105528.8 | 88927.167 | 112554      | 67797.2 | 34843.5 |  |  |                 |  |  |  |  |  |  |  |  |  |  |  |  |
| 6       |  | 125004.5 | 161751  | 65665.6  | 143650   | 128788.4  | 180180      | 138750  | 5430.53 |  |  |                 |  |  |  |  |  |  |  |  |  |  |  |  |

| Tic ff SI |             | Tic ff Rorc-crc |            | S Tic ff LI |  | Tic ff Rorc-crc LI |  |
|-----------|-------------|-----------------|------------|-------------|--|--------------------|--|
| 40303.9   | 4110.08     | 24315.2         | 6405.75    |             |  |                    |  |
| 33742.8   | 2113.28     | 28828.8         | 4403.36    |             |  |                    |  |
| 32320.6   | 3424.546667 | 20381.4         | 3711.587   |             |  |                    |  |
| 47424     | 2113.28     | 19307.2         | 3063.84    |             |  |                    |  |
| 24596     | 1815.95567  | 11192.1         | 1955.2     |             |  |                    |  |
| 40213.33  | 734.794667  | 15039.4         | 3902.38333 |             |  |                    |  |
| 18901.033 | 5333.46667  | 8042.67         | 6049.33333 |             |  |                    |  |
| 23582     |             | 11786.7         |            |             |  |                    |  |
| 59377.5   |             | 15229.5         |            |             |  |                    |  |

| Tic ff SI |          | Tic ff Rorc-crc |          | S Tic ff LI |  | Tic ff Rorc-crc LI |  |
|-----------|----------|-----------------|----------|-------------|--|--------------------|--|
| 31868.2   | 1926.6   | 39078           | 11103.3  |             |  |                    |  |
| 24369.8   | 6760     | 62462.4         | 15184    |             |  |                    |  |
| 41704     | 11813.68 | 46250.1         | 12119.47 |             |  |                    |  |
| 41194     | 8981.44  | 44118.8         | 13617.07 |             |  |                    |  |
| 26235.7   | 4752.8   | 35089.6         | 4888     |             |  |                    |  |
| 41821.9   | 3116.317 | 39031.2         | 9063.6   |             |  |                    |  |
| 15959     | 5490.333 | 21363.3         | 13308.53 |             |  |                    |  |
| 21616.8   |          | 34181.3         |          |             |  |                    |  |
| 25447.5   |          | 30459           |          |             |  |                    |  |

| Tic ff SI |          | Tic ff Rorc-crc |          | S Tic ff LI |  | Tic ff Rorc-crc LI |  |
|-----------|----------|-----------------|----------|-------------|--|--------------------|--|
| 126536    | 5073.38  | 63393.2         | 23914.8  |             |  |                    |  |
| 125598    | 25073.38 | 71334.9         | 23535.2  |             |  |                    |  |
| 185583    | 32756.53 | 73265.4         | 18936.67 |             |  |                    |  |
| 233376    | 23774.4  | 48672           | 19574.53 |             |  |                    |  |
| 122980    | 12476.1  | 56811.7         | 8920.6   |             |  |                    |  |
| 239671    | 7216.733 | 55655.6         | 18862.5  |             |  |                    |  |
| 100564    | 21961.33 | 36443.3         | 24197.33 |             |  |                    |  |
| 125771    |          | 61290.7         |          |             |  |                    |  |
| 191705    |          | 58149           |          |             |  |                    |  |

| Tic ff SI   |             | Tic ff Rorc-crc |             | S Tic ff LI |  | Tic ff Rorc-crc LI |  |
|-------------|-------------|-----------------|-------------|-------------|--|--------------------|--|
| 8713.109167 | 4179.743    | 58510.79        | 16041.03    |             |  |                    |  |
| 18671.92167 | 8424.734067 | 71359.24        | 8681.088    |             |  |                    |  |
| 22489.11    | 5476.5165   | 40000.33        | 18618.11767 |             |  |                    |  |
| 49169.0745  | 14037.998   | 33899.197       | 22538.816   |             |  |                    |  |
| 54647.35467 | 11815.7     | 45324.448       | 21974.33    |             |  |                    |  |
| 88928.8335  | 8095.967    | 56295.155       | 24916.67    |             |  |                    |  |
| 35630.83    | 6425.683    | 76392.5         | 25844       |             |  |                    |  |
| 37459.5     |             | 118497.2        |             |             |  |                    |  |
| 23166       |             | 80916.33        |             |             |  |                    |  |

| Tic ff SI |  | Tic ff Rorc-crc |  | S Tic ff LI |  | Tic ff Rorc-crc LI |  |
|-----------|--|-----------------|--|-------------|--|--------------------|--|
| 39699.3   |  |                 |  |             |  |                    |  |
| 90936.8   |  |                 |  |             |  |                    |  |
| 124069    |  |                 |  |             |  |                    |  |
| 70237.4   |  |                 |  |             |  |                    |  |
| 37676.2   |  |                 |  |             |  |                    |  |
| 61227.2   |  |                 |  |             |  |                    |  |
| 63906     |  |                 |  |             |  |                    |  |
| 82316.9   |  |                 |  |             |  |                    |  |
| 118866    |  |                 |  |             |  |                    |  |

| Tic ff SI |             | Tic ff Rorc-crc |             | S Tic ff LI |  | Tic ff Rorc-crc LI |  |
|-----------|-------------|-----------------|-------------|-------------|--|--------------------|--|
| 57433.06  | 5950.31     | 31696.6         | 8328.329    |             |  |                    |  |
| 67181.91  | 1758.9858   | 38572.6         | 10203.65    |             |  |                    |  |
| 86535.8   | 18555.0872  | 33799.8         | 13101.14347 |             |  |                    |  |
| 94653.312 | 12431.3696  | 26772.6         | 11710.68    |             |  |                    |  |
| 60427.45  | 4187.69206  | 45019.8         | 3016.3648   |             |  |                    |  |
| 105725.68 | 3065.815935 | 29970.2         | 6914.0162   |             |  |                    |  |
| 29060.714 | 6914.682667 | 11748.8         | 6680.2788   |             |  |                    |  |
| 42368.993 |             | 24795.1         |             |             |  |                    |  |
| 41500.122 |             | 13472.4         |             |             |  |                    |  |

| Tic ff SI |      | Tic ff Rorc-crc |      | S Tic ff LI |  | Tic ff Rorc-crc LI |  |
|-----------|------|-----------------|------|-------------|--|--------------------|--|
| 47        | 4.54 | 20.2            | 13.3 |             |  |                    |  |
| 40.7      | 6.64 | 17.3            | 12.5 |             |  |                    |  |
| 38.7      | 8.22 | 16.9            | 13.1 |             |  |                    |  |
| 53.8      | 10.9 | 28.3            | 12.3 |             |  |                    |  |
| 49.6      | 23.9 | 29              | 14   |             |  |                    |  |
| 46.5      | 20.9 | 29.8            | 17.6 |             |  |                    |  |
| 48        | 14   | 21.4            | 19.6 |             |  |                    |  |
| 46.8      | 18.9 | 26.5            | 19.2 |             |  |                    |  |
|           | 16.8 |                 | 19.4 |             |  |                    |  |

| Tic ff SI |      | Tic ff Rorc-crc |      | S Tic ff LI |  | Tic ff Rorc-crc LI |  |
|-----------|------|-----------------|------|-------------|--|--------------------|--|
| 12.4      | 2.84 | 6.43            | 2.94 |             |  |                    |  |
| 8.7       | 5.58 | 6               | 4.43 |             |  |                    |  |
| 14.1      | 2.87 | 6.47            | 3.17 |             |  |                    |  |
| 13.1      | 3.91 | 2.97            | 2.1  |             |  |                    |  |
| 9         | 4    | 3.03            | 1.85 |             |  |                    |  |
| 9.38      | 5.2  | 3.13            | 2.4  |             |  |                    |  |

| ml.N |      |      |      |      |  |
|------|------|------|------|------|--|
| 9.55 | 18.6 | 2.36 | 5.92 |      |  |
| 15.8 | 2.37 | 1.53 | 0.78 | 4.07 |  |

| The fit Rows are |         |         |         |       |  |
|------------------|---------|---------|---------|-------|--|
| 18193.5          | 27904.5 | 57018   | 81081   | 39780 |  |
| 35661.6          | 8233.55 | 2014.13 | 10828.4 | 17225 |  |

| The fit Rows are |         |         |         |       |  |
|------------------|---------|---------|---------|-------|--|
| 17680            | 22741.3 | 19773   | 18252   | 18513 |  |
| 36285.9          | 29068   | 25025   | 12323.3 | 14664 |  |
| 16702.4          | 41850.9 | 42515.2 | 15210   |       |  |

| The fit Rows are LI |         |         |  |  |  |
|---------------------|---------|---------|--|--|--|
| 467.961             | 52616.4 | 17242.6 |  |  |  |
| 1900.27             | 72072   | 12329.4 |  |  |  |
| 18001.2             | 52447.6 | 14634.3 |  |  |  |
| 12431.4             | 46747.3 | 14638.3 |  |  |  |
| 8195.61             | 23691.7 | 6261.53 |  |  |  |
| 5993.17             | 39037.1 | 15634.7 |  |  |  |
| 12458.4             | 23399.1 | 16537.4 |  |  |  |
|                     | 44606.6 |         |  |  |  |
|                     | 47704.3 |         |  |  |  |
