# Supplementary material
Source: PubMed Central journal article supplement (PMC11256193)
Supplement: NIHMS2007062-supplement-Source_Data_Fig__6.pdf [file NIHMS2007062-supplement-Source_Data_Fig__6.pdf]

Fig. 5b.

| Ahr/+ ILCS L1 | Ahr/- ILCS L1 | Ahr/+ ILCS S1 | Ahr/- ILCS S1 |
|---------------|---------------|---------------|---------------|
| 9.21          | 20.6          | 20.6          | 27.6          |
| 11            | 17.2          | 18.6          | 32.9          |
| 9.9           | 25.5          | 18.5          | 24.8          |
| 14.1          | 26.4          | 15.8          | 32.1          |
| 12.7          | 15.9          | 17.4          |               |
| 8.76          | 17.7          |               |               |
| 11.1          |               |               |               |
| 10.2          |               |               |               |

Fig. 5c.

| Ahr/+ ILC2 L1 | Ahr/- ILC2 L1 | Ahr/+ ILC2 S1 | Ahr/- ILC2 S1 |
|---------------|---------------|---------------|---------------|
| 14            | 13.6          | 25.8          | 18.3          |
| 16            | 13            | 22            | 20.5          |
| 13.3          | 5.65          | 20.7          | 13            |
| 5.72          | 6.02          | 19.6          | 9.24          |
| 7.92          | 4.71          | 5.04          |               |
| 5.06          | 6.01          |               |               |
| 8.67          |               |               |               |
| 5.43          |               |               |               |

Fig. 5d.

| Ahr/+ ILC1 L1 | Ahr/- ILC1 L1 | Ahr/+ ILC1 S1 | Ahr/- ILC1 S1 |
|---------------|---------------|---------------|---------------|
| 28.3          | 38            | 22.8          | 27.7          |
| 30.7          | 32.1          | 28.3          | 33.6          |
| 26.9          | 31.1          | 29.3          | 25.9          |
| 29.5          | 34.2          | 20            | 17.9          |
| 28.6          | 25.8          | 27.4          |               |
| 24.1          | 29.2          |               |               |
| 25.9          |               |               |               |
| 22.2          |               |               |               |

Fig. 6f.

| Ahr/+ LI | Ahr dCAIR/+ LI | Ahr dCAIR/+ L1 | Ahr dCAIR/+ L | Ahr/+ S1 | Ahr dCAIR/+ S1 | Ahr dCAIR/+ S1 | Ahr dCAIR/+ S1 |
|----------|----------------|----------------|---------------|----------|----------------|----------------|----------------|
| 22.5     | 12.7           |                | 9.37          | 20.7     | 10.9           | 9.62           |                |
| 16.5     | 14.9           | 9.83           | 14.1          | 10       | 10.7           |                |                |
| 22.7     | 14.7           | 13.1           | 16.3          | 10.6     | 12.4           |                |                |
| 16.4     | 13.2           | 10.8           | 15.2          | 9.19     | 13.1           |                |                |
| 21.3     | 13.1           | 12             | 15.8          | 8.88     | 7.99           |                |                |
| 19       | 8.14           | 12.8           | 14.5          | 6.17     | 10.4           |                |                |
|          | 7.25           | 11.9           | 5.02          | 13.4     |                |                |                |
|          |                | 10.5           |               | 12.7     |                |                |                |

Fig. 6h.

| Ahr ff LI | Ahr ff RORc-cre LI | Ahr ff S1 | Ahr ff RORc-cre S1 |
|-----------|--------------------|-----------|--------------------|
| 12.5      | 16.5               | 15.4      | 20.2               |
| 12.9      | 21.9               | 14        | 22.8               |
| 14.5      | 17.5               | 12.7      | 26.2               |
| 13.7      | 17.9               | 13.3      | 28                 |
| 16.5      | 20.5               | 15.1      | 24                 |
| 14.9      | 22.6               | 13.5      | 24.6               |
| 8.79      | 20.2               | 19.2      | 27                 |
| 11.8      | 23.8               |           |                    |

Fig. 6j.

| Ahr CAIR/+ S1 | Ahr CAIR/+ RORc-cre S1 | Ahr CAIR/+ LI | Ahr CAIR/+ RORc-cre LI |
|---------------|------------------------|---------------|------------------------|
| 15.2          | 10.8                   | 16.9          | 16.9                   |
| 18.3          | 7.63                   | 13.9          | 17.5                   |
| 14.4          | 8.93                   | 12.4          | 12.5                   |
| 18.2          | 7.5                    | 14.2          | 18.6                   |
| 12.9          | 8.96                   | 8.11          | 24.9                   |
| 18.2          | 8.37                   | 24.8          | 24                     |
| 18.2          | 11.4                   | 19.4          | 27                     |
| 15.8          |                        | 19.5          |                        |

Fig. 6i.

| Ahr/+ | Ahr/- | Ahr/+ -iron | Ahr/- -iron |
|-------|-------|-------------|-------------|
| 23.4  | 9.58  | 23.7        | 20.8        |
| 21.6  | 6.99  | 23.6        | 20.1        |
| 25.6  | 5.82  | 25.3        | 16.1        |
| 28.9  | 6.75  | 26.5        | 18.2        |
| 25.8  | 6.86  | 24.4        | 12.7        |
| 23.6  |       | 31.7        | 14.4        |
| 32    |       | 23          |             |
|       |       | 34.8        |             |

Fig. 6m.

| Ahr/+    | Ahr/-    | Ahr/+ -iron | Ahr/- -iron |
|----------|----------|-------------|-------------|
| 248976   | 7917     | 163254      | 18557.93    |
| 244365.3 | 11591.45 | 102513.7    | 22880       |
| 251409.2 | 14022.88 | 136071      | 15425.8     |
| 307710   | 10590.57 | 206516      | 18470.83    |
| 232277.5 | 17212    | 247845      | 22425       |
| 223367.1 |          | 191676.3    | 23070.67    |
| 264109.6 |          | 167347.9    |             |
|          |          | 71890       |             |

Fig. 6n.

| Ahr/+    | Ahr/-    | Ahr/+ -iron | Ahr/- -iron |
|----------|----------|-------------|-------------|
| 114775.8 | 3826.692 | 63607.54    | 7157.571    |
| 77116.13 | 2098.005 | 100625.1    | 8053.283    |
| 81913.1  | 2526.936 | 71903.6     | 5567.38     |
| 110494.6 | 3309.4   | 53384.06    | 4829.968    |
| 100060.8 | 3511.248 | 37417.49    | 5830.5      |
| 71030.73 |          | 44903.43    | 7036.553    |
| 110802.7 |          | 60747.29    |             |
|          |          | 20416.76    |             |

Fig. 6o.

| Ahr/+    | Ahr/-    | Ahr/+ -iron | Ahr/- -iron |
|----------|----------|-------------|-------------|
| 90466.74 | 1906.32  | 28499.48    | 3331.973    |
| 35073.9  | 1868.412 | 53296.68    | 3841.933    |
| 38342.3  | 2538.528 | 38718.62    | 5381.801    |
| 58403.31 | 3197.217 | 47343.66    | 5948.8      |
| 77434.02 | 3012.1   | 28703.83    | 4933.5      |
| 68360.33 |          | 39188.45    | 4138.878    |
| 82360    |          | 51877.85    |             |
|          |          | 21567       |             |

Fig. 6p.

| Ahr ff | Ahr ff RORc-cre | Ahr ff -iron | Ahr ff RORc-cre-iron |
|--------|-----------------|--------------|----------------------|
| 32.4   | 19.7            | 35.1         | 34.2                 |
| 33.2   | 17.2            | 43.4         | 24                   |
| 36.1   | 24.8            | 41.4         | 29.3                 |
| 33.8   | 18.8            | 39.2         | 33.3                 |
| 38.4   | 17.9            | 36.5         | 28.6                 |
| 42     | 21.2            |              | 37.4                 |

Fig. 6q.

| Ahr ff | Ahr ff RORc-cre | Ahr ff -iron | Ahr ff RORc-cre-iron |
|--------|-----------------|--------------|----------------------|
| 24.5   | 22              | 32.9         | 40.2                 |
| 9.36   | 23.8            | 35.5         | 36                   |
| 15.4   | 23.2            | 32.7         | 37.9                 |
| 14     | 22              | 40.7         | 25.9                 |
| 44.8   | 23              | 22.4         | 17                   |
| 26.5   | 23.9            |              | 29.6                 |
