# Supplementary material
Source: PubMed Central journal article supplement (PMC11256193)
Supplement: NIHMS2007062-supplement-Source_Data_Source_Data_Fig__7.pdf [file NIHMS2007062-supplement-Source_Data_Source_Data_Fig__7.pdf]

Fig. 7f:

| pTlc    | cyp11a1  | β12b       |
|---------|----------|------------|
| 0.01378 | 0.009325 | 0.000105   |
| 0.01628 | 0.01036  | 1.4734E-05 |
| 0.01626 | 0.009279 | 2.4079E-06 |

Fig. 7h:

| *MIG* | *MIG-AN* | *MIG-YSA* |
|-------|----------|-----------|
| 46.7  | 27.4     | 40.6      |
| 46    | 26.8     | 39.6      |
| 45.7  | 26       | 39        |
