# Supplementary material
Source: PubMed Central journal article supplement (PMC11256193)
Supplement: NIHMS2007062-supplement-Supplementary_Information.pdf [file NIHMS2007062-supplement-Supplementary_Information.pdf]

---

# Nutrition impact on ILC3 maintenance and function centers on a cell-intrinsic CD71–iron axis

---

In the format provided by the authors and unedited

---

## **Supplementary Information**

This file included supplementary table 1.

**Supplemental Table 1. Primers for RT-qPCR and ChIP assays.**

| Name                     | Sequence                    |
|--------------------------|-----------------------------|
| <i>mActin</i> -FW        | CTTCTTTGCAGCTCCTTCGTT       |
| <i>mActin</i> -RV        | AGGAGTCCTTCTGACCCATTC       |
| <i>mIl22</i> -FW         | GACCAAACCTCAGCAATCAGCTC     |
| <i>mIl22</i> -RV         | TACAGACGCAAGCATTCTCAG       |
| <i>mAhrr</i> -FW         | CTGCCCCGGGATCAAAGATG        |
| <i>mAhrr</i> -RV         | CTCTGTATTGAGGCGGTCCC        |
| <i>mCyp1a1</i> FW        | GGTTAACCATGACCGGGAACCT      |
| <i>mCyp1a1</i> RV        | TGCCCAAACCAAAGAGAGTGA       |
| <i>mTfrc</i> -FW         | AGTGTCAGAAAACCCAAGAGG       |
| <i>mTfrc</i> -RV         | CGTTTCAGCCAGTTTCACAC        |
| <i>mRorc</i> -FW         | TCCACTACGGGGTTATCACCT       |
| <i>mRorc</i> -RV         | AGTAGGCCACATTACACTGCT       |
| <i>mTfrc</i> -ChIP-FW    | GTGTCGGTCAAGGTTAGG          |
| <i>mTfrc</i> -ChIP-RV    | TAGAAAAGGCGCCAAGGC          |
| <i>Cyp1a1</i> -ChIP-F    | TTAAGAGCCTCACCCACGGTT       |
| <i>Cyp1a1</i> -ChIP-R    | ACCCAGCTACCCAACCTCACAA      |
| <i>Il12b</i> -ChIP-F     | TAGTATCTCTGCCTCCTTCC        |
| <i>Il12b</i> -ChIP-R     | GAAC TTTCTGATGGAAACCC       |
| Eubacteria-FW            | ACTCCTACGGGAGGCAGCAGT       |
| Eubacteria-RV            | ATTACCGCGGCTGCTGGC          |
| <i>H. apodemus</i> -FW   | TGGGAGTGCCCTTTTAGGGAG       |
| <i>H. apodemus</i> -RV   | TGAGATTTGCTCCATTCAC         |
| <i>H. typhlonius</i> -FW | AGGGACTCTTAAATATGCTCCTAGAGT |
| <i>H. typhlonius</i> -RV | ATTCATCGTGTTTGAATGCGTCAA    |
